# Supplementary material for: The βI domain promotes active β1 integrin clustering into mature adhesion sites
Source: Life Sci Alliance. 2022 Nov 21;6(2):e202201388. doi: 10.26508/lsa.202201388 (PMC9679427; doi:10.26508/lsa.202201388)
Supplement: Supplementary file 1 [file LSA-2022-01388_SdataF1.xlsx]

## Sheet: Sheet1
	PLA
		CTL-	0.07	0.132	0.076	0.044	0.031	0.303	0.236	0.2	0.197	0.208
		CTL+	0.707	0.707	0.984	0.753	1.13	0.99	1.437	1.086	1.062	0.94	0.91	0.892	0.768	0.677	0.977	0.912	1.066	1.731	0.976	1.138	0.949	0.913	1.03	0.696	0.832	1.16	1.281
		12G10	0.386	0.386	0.412	0.682	0.757	0.396	0.391	0.573	0.441	0.889	0.411	0.338	0.264	0.377	0.353	0.353	0.582	0.446	0.519	0.462	0.29	0.301	0.531	1.144	0.764	0.458	0.531	0.905
