# Supplementary material for: The βI domain promotes active β1 integrin clustering into mature adhesion sites
Source: Life Sci Alliance. 2022 Nov 21;6(2):e202201388. doi: 10.26508/lsa.202201388 (PMC9679427; doi:10.26508/lsa.202201388)
Supplement: Supplementary file 6 [file LSA-2022-01388_SdataF3.1.xlsx]

## Sheet: Sheet1
	Recovery
		DMSO	1.37497	1.01106	1.34777	0.774529	0.404227	1.53909	1.02311	0.840232	0.685015	0.727449	1.02189	1.19572	1.21743	1.38102	0.824964	1.31609	0.999056	0.938571	0.652079	0.817278	0.91122	1.33499	0.668884	0.941739	1.0516	1.62932	0.828885	0.517227	0.93494	0.809616	1.28001
		FAK-Inhibitor	0.499442	0.996127	0.667478	0.473286	0.746981	0.729011	0.397934	0.828722	0.549241	0.383793	0.724745	0.889023	1.09677	1.06047	0.427366	0.799391	1.03435	0.829161	0.876461	0.796251	1.09392	0.817763	0.507816	0.709279	0.677496	1.59125	0.733945	0.73134	0.427731	0.513103	0.427626	0.47305	0.9838	0.802707	0.540728	0.388453	0.542667
	Relative mFD
		DMSO	0.88	1.11	1.23	0.76	0.91	1.05	1.05	1.03	1.01	1	0.91	1.09	0.96	1.1	0.91	1.06	1.11	0.93	0.9
		FAK-Inhibitor	1.18	1.09	0.98	0.82	1.41	1.15	1.45	1	1.36	1.33	1.4	1.35	1.57	1.45	1.2	1.16	1.21	1.3	1.09	1.24	1.09
