# Supplementary material for: The βI domain promotes active β1 integrin clustering into mature adhesion sites
Source: Life Sci Alliance. 2022 Nov 21;6(2):e202201388. doi: 10.26508/lsa.202201388 (PMC9679427; doi:10.26508/lsa.202201388)
Supplement: Supplementary file 11 [file LSA-2022-01388_SdataFS3.xlsx]

## Sheet: Sheet1
	Relative mFD of 9EG7+ (whole mAb) or 9EG7-Fab+ elongated adhesions
		9EG7	0.96	1.03	1.08	1.03	1.1	0.91	0.9	1.15	0.85	0.97	1.09	0.92	1.08	1.1	0.9	1.07	0.93	0.95	1.02	0.91	1.03	1.05
		9EG7/12G10	0.9	1.06	0.91	0.99	0.86	1.11	0.92	1.3	1.2	1.08	1.12	1.15	1	1.05	1.01	0.96	1.05	0.94	0.88	1.06	0.97	0.94
		9EG7-Fab	0.92	0.84	0.89	1.08	1.17	1.01	0.93	0.77	0.99	0.97	0.87	1.09	1.06	1.23	0.96	0.85	1.02	0.88	0.9	1.3	1.26	1.01	1.04	1.18	1.2
		9EG7-Fab/12G10	0.65	0.82	0.71	0.71	0.64	0.72	0.66	0.76	0.75	0.73	0.79	0.69	0.61	0.61	0.68	0.77	0.7	0.74	0.68	0.66	0.6	0.67	0.75	0.69
