# Supplementary material for: The βI domain promotes active β1 integrin clustering into mature adhesion sites
Source: Life Sci Alliance. 2022 Nov 21;6(2):e202201388. doi: 10.26508/lsa.202201388 (PMC9679427; doi:10.26508/lsa.202201388)
Supplement: Supplementary file 12 [file LSA-2022-01388_SdataF4.xlsx]

## Sheet: Sheet1
	PCC relative increase: 9EG7-EEA1
		9EG7	0.562944	0.60882	1.29123	1.17368	0.562944	1.15743	1.64295	0.843552	1.38372	0.795455	1.27735	0.740883	0.753832	1.20521	0.516544	0.640116	0.918728	0.850418	0.762152	1.47442	1.33242	1.3378	1.16741
		9EG7 + 12G10	4.21395	3.93583	3.47611	3.94443	3.31745	3.72843	3.29069	1.98309	3.0773	2.71935	2.98203	2.73969	2.71009	2.64257	2.595	2.32176	2.47527	3.05475	3.06166	2.39928	3.11922	1.64634	1.9096
	Internalization of 9EG7+ β1 integrins (%)
		CTL								12G10
	5'	9.73384	12.9278	24.7614	22.9586	28.579	8.15473	5.85468	8.57292	35.2852	34.0684	39.5016	48.4093	55.0901	29.7961	31.2598	37.7418
	10'	18.7072	16.4259	25.9279	27.4125	29.2153	19.7595	18.8186	19.8641	42.8897	53.2319	52.0149	61.3468	67.2853	54.574	43.0737	56.9786
	Relative Cell Migration (%)
		CTL
	30	0.2093	0.2161	0.2358	0.5083	0.5327	0.224	0.5404	0.44	0.3148	0.3708	0.1027	0.1679	0.1732	0.1622
	60	1.18	0.918	1.0952	1.6586	1.6717	1.5171	1.9031	2.0282	2.0093	2.1184	1.0114	1.6404	1.7878	1.8351
	90	1.8184	1.4175	1.6952	2.2873	2.3722	2.4719	2.7188	2.9701	3.1294	3.3332	1.9908	2.5757	3.0101	3.0512
	120	2.1562	1.7109	2.0192	2.5097	2.6775	2.8165	2.9888	3.4107	3.5939	3.7712	2.597	2.9854	3.5847	3.4776
	150	2.3788	1.9313	2.2243	2.5489	2.7283	2.8392	2.9786	3.5753	3.7737	3.8785	2.8433	3.1959	3.7543	3.6667
	180	2.4998	2.0897	2.3084	2.6028	2.8196	2.8903	2.9609	3.6842	3.865	3.8885	2.9918	3.2598	3.7525	3.6806
	210	2.5443	2.1977	2.3321	2.619	2.8386	2.8678	2.9486	3.6758	3.8523	3.8727	3.0962	3.3061	3.7465	3.644
		9EG7
	30	0.272	0.2616	0.2821	0.2459	0.6459	0.2721	0.2882	0.3233	0.3555	0.318	0.3754	0.1672	0.1707	0.1534	0.1343
	60	1.3916	1.5599	1.5803	1.6515	2.2572	1.7455	1.593	2.2136	2.1834	1.9692	2.1009	1.9407	1.8779	1.8587	1.6807
	90	2.5246	2.8652	2.872	2.827	3.2177	3.0144	2.8194	3.9243	3.7491	3.8584	3.6678	3.4946	3.3708	3.363	3.1634
	120	3.1948	3.5674	3.5462	3.4646	3.6536	3.684	3.4435	4.6733	4.3769	4.6061	4.2964	4.3197	4.0567	4.0579	3.9481
	150	3.6236	3.9392	3.8832	3.6746	3.7129	3.9281	3.6985	4.95	4.5751	4.8439	4.5162	4.8561	4.4762	4.5168	4.3163
	180	3.9006	4.1826	4.097	3.8184	3.7753	4.0974	3.8553	5.0796	4.6519	4.8535	4.5795	5.0851	4.6788	4.7297	4.5869
	210	4.0842	4.3611	4.2307	3.8888	3.8018	4.2257	3.9222	5.061	4.641	4.8222	4.5596	5.2653	4.7952	4.8916	4.7436
		12G10
	30	0.2907	0.2906	0.2864	0.3488	0.3004	0.3595	0.2689	0.2959	0.3717	0.3207	0.3626	0.1881	0.1479	0.1541	0.139
	60	1.3274	1.263	1.3801	1.3306	1.1154	1.444	0.9608	1.4475	1.6959	1.4785	1.6515	1.5647	1.5686	1.5243	1.5415
	90	2.2724	2.2223	2.5126	2.1962	1.8001	2.3351	1.6119	2.547	2.8211	2.5011	2.6626	2.7397	2.8273	2.7396	2.7608
	120	2.7619	2.6827	3.0152	2.6441	2.1991	2.8291	2.0572	3.2905	3.573	3.1576	3.3712	3.5092	3.515	3.4313	3.5433
	150	3.0549	2.9123	3.191	2.766	2.3971	2.9555	2.2597	3.7502	4.0635	3.5351	3.8099	3.8315	3.8206	3.7457	3.9008
	180	3.1931	3.0337	3.2913	2.8733	2.4347	3.0376	2.3912	3.9888	4.239	3.765	3.9841	3.9643	3.991	3.8793	4.0277
	210	3.2539	3.095	3.3276	2.9209	2.4632	3.082	2.4482	4.0749	4.2466	3.8396	4.0484	4.0527	4.0347	3.9798	4.1482
	Relative Cell Migration (%)
		CTL
	30	0.188	0.2074	0.1698	0.1956	0.2319	0.02	0.2684	0.1642	0.1483	0.1141
	60	0.7308	0.8168	0.6591	0.6929	0.7827	0.3984	0.9749	0.692	0.6684	0.5954
	90	1.1368	1.274	1.0943	1.081	1.1968	0.7406	1.5389	1.1261	1.082	1.0333
	120	1.3672	1.5128	1.353	1.2686	1.4571	0.9097	1.9078	1.413	1.3142	1.3319
	150	1.5129	1.616	1.4837	1.3488	1.6322	1.0246	2.1773	1.6397	1.4351	1.5272
	180	1.6182	1.668	1.5648	1.3972	1.7984	1.0864	2.4045	1.7894	1.7246	1.6805
	210	1.6833	1.7196	1.626	1.4634	1.9325	1.1273	2.5676	1.9315	1.8679	1.8212
		9EG7
	30	0.2562	0.2319	0.2482	0.2367	0.1812	0.1842	0.1311	0.1429	0.1258	0.1307
	60	1.0288	0.9468	0.8951	1.002	0.8096	0.8706	0.6453	0.6749	0.6636	0.6682
	90	1.6928	1.4319	1.3205	1.6306	1.5104	1.6391	1.1398	1.1359	1.2709	1.2542
	120	2.0473	1.6928	1.5396	1.9565	2.0678	2.3184	1.5193	1.4868	1.7849	1.7394
	150	2.2189	1.8415	1.6437	2.1693	2.4632	2.8298	1.7874	1.7494	2.1191	2.0728
	180	2.2946	1.9316	1.7041	2.2498	2.7953	3.2656	2.0284	1.9563	2.3735	2.3238
	210	2.3643	2.0086	1.7654	2.3131	3.0503	3.5444	2.2041	2.1171	2.5904	2.5384
		9EG7 + 12G10
	30	0.2431	0.1959	0.1951	0.1898	0.1525	0.1818	0.1713	0.186	0.1575	0.1759
	60	0.8217	0.8258	0.7173	0.6738	0.5262	0.5872	0.7207	0.7045	0.5264	0.5945
	90	1.1934	1.2758	1.1641	1.0984	0.8255	0.9148	1.2906	1.2251	0.8133	0.916
	120	1.3704	1.4694	1.5653	1.4538	1.0475	1.1795	1.6662	1.5782	1.0084	1.1571
	150	1.4603	1.5704	1.9249	1.7438	1.2256	1.4332	1.9222	1.8116	1.1323	1.3384
	180	1.5437	1.6627	2.1996	1.9817	1.3705	1.6638	2.1381	2.0166	1.2429	1.4918
	210	1.6112	1.7756	2.52	2.1809	1.4958	1.8601	2.3214	2.2174	1.3488	1.6354
