# Supplementary material for: The βI domain promotes active β1 integrin clustering into mature adhesion sites
Source: Life Sci Alliance. 2022 Nov 21;6(2):e202201388. doi: 10.26508/lsa.202201388 (PMC9679427; doi:10.26508/lsa.202201388)
Supplement: Supplementary file 13 [file LSA-2022-01388_SdataFS4.xlsx]

## Sheet: Sheet1
	PCC relative increase: SNAKA51-EEA1
		CTL	0.92045	0.893335	1.00033	0.829944	1.09413	1.17841	1.13737	0.901762	0.983841	0.854304	1.03739	0.697664	1.0209	1.10678	1.22976	1.0532	1.0468	0.871667	0.802297	1.0576	1.14061	0.978564	1.02519	1.12185	1.04737	0.908057
		12G10	1.76249	1.60969	1.70239	1.56059	1.63021	1.92591	1.4873	1.11392	1.17585	1.42315	1.74502	1.55849	1.75842	1.62239	1.64197	1.57086	2.71962	2.53369	2.51947	2.57406	2.32899	2.49332	2.70655	2.44442	2.63433	2.70256
